# Supplementary material for: Spider-web-structured CNTs/CuS coating-based flexible pressure sensor with extreme self-heating and anti-freezing ability as a safeguard for winter sports
Source: Royal Society of Chemistry journal article supplement (doi:10.1039/d4tc02354d), 2024-01-01
Supplement: d4tc02354d5.pdf [file d4tc02354d5.pdf]

**Spider web structured CNTs/CuS coating-based flexible pressure sensor with extreme self-heating and anti-freezing ability for winter sports safeguard**

Sheng Zhang<sup>a,b</sup>, Junyin Cheng<sup>a,b</sup>, Bo Song<sup>c</sup>, Shun LingHu<sup>a,b</sup>, Yijun Tang<sup>a,b</sup>, Qing Li<sup>a,b\*</sup>,  
Lei Chen<sup>a,b\*</sup>

a State Key Laboratory of Resource Insects, Southwest University, Chongqing 400715,  
China

b College of Sericulture, Textile and Biomass Science, Southwest University,  
Chongqing 400715, China

c Marine College, Shandong University, Weihai 264209, China

---

\* Corresponding authors. Tel: +86 6825 1228; Fax: +86 6825 1228.  
E-mail: [raychen@swu.edu.cn](mailto:raychen@swu.edu.cn) (L. Chen) [qingli@swu.edu.cn](mailto:qingli@swu.edu.cn) (Q. Li)

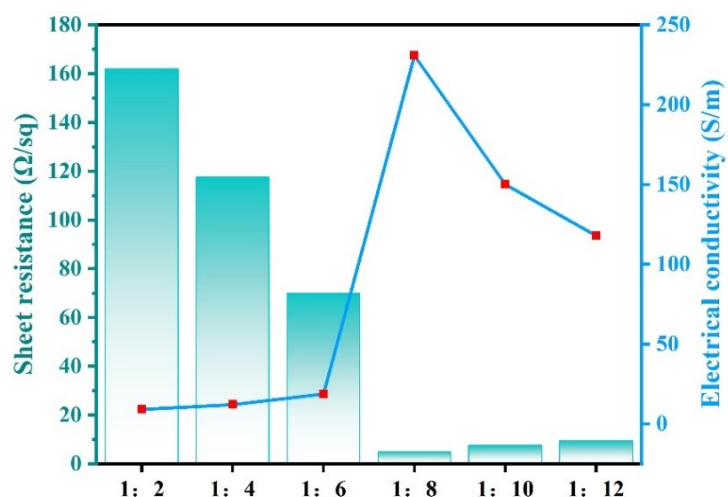

**Fig. S1.** Sheet resistance and electrical conductivity of CNTs/CuS coatings with different weight ratios of CNTs: CuS.

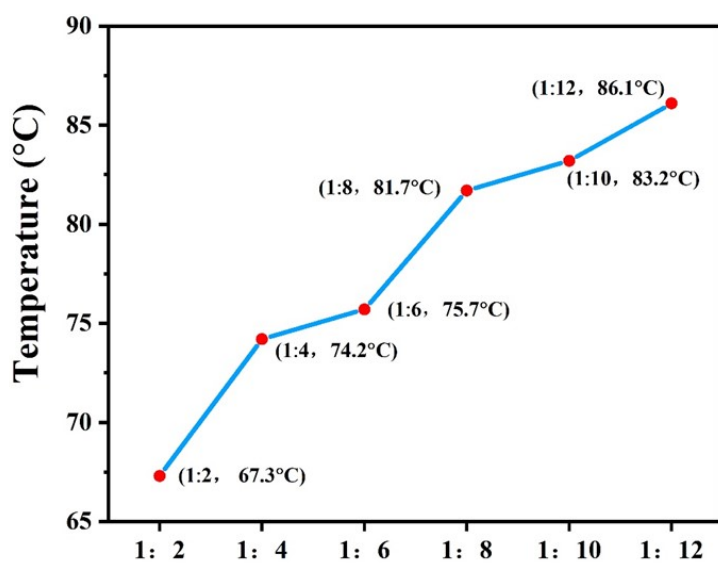

**Fig. S2.** Surface temperature of CNTs/CuS coatings with different weight ratios of CNTs: CuS after being irradiated for 5 min under a light intensity of 100 mW/cm<sup>2</sup>.

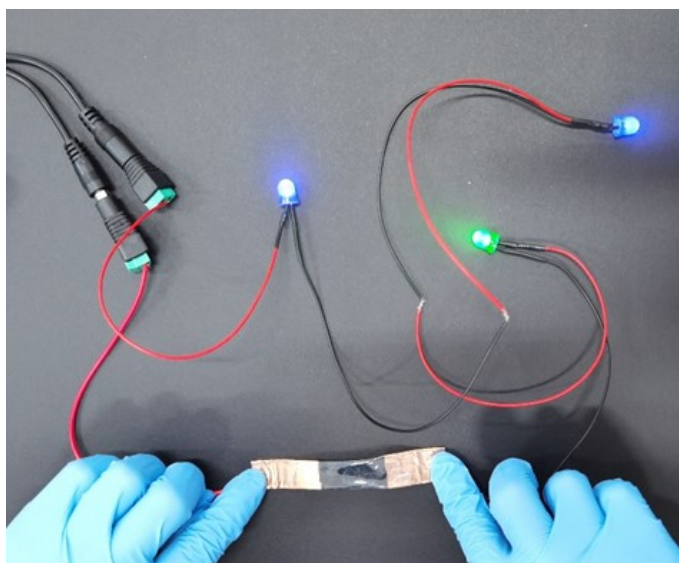

**Fig. S3.** Digital photograph of the SF/CNTs/CuS pressure sensor illuminating 3 LEDs.

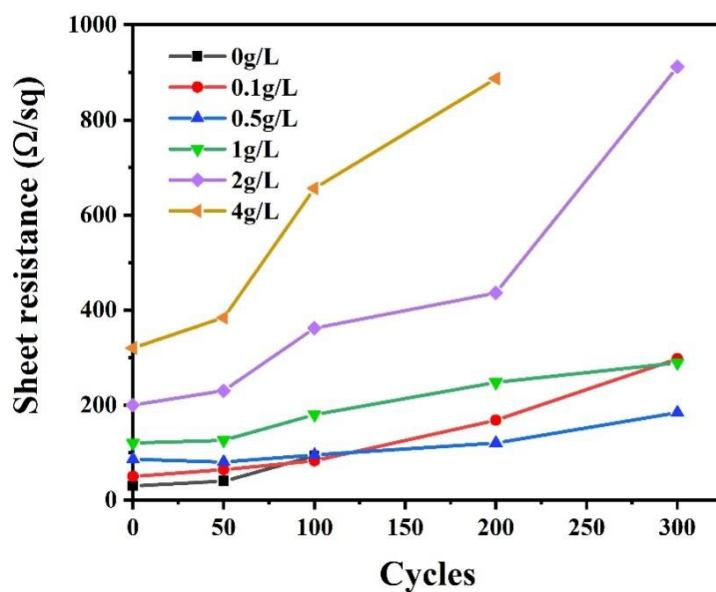

**Fig. S4.** Surface resistance of CNTs/CuS coatings with different HPMC concentration with the increase of rubbing cycle (The resistance is unmeasurable because the coating falls off after 100 and 200 rubbing cycles at HPMC concentrations of 0 and 4 g/L).

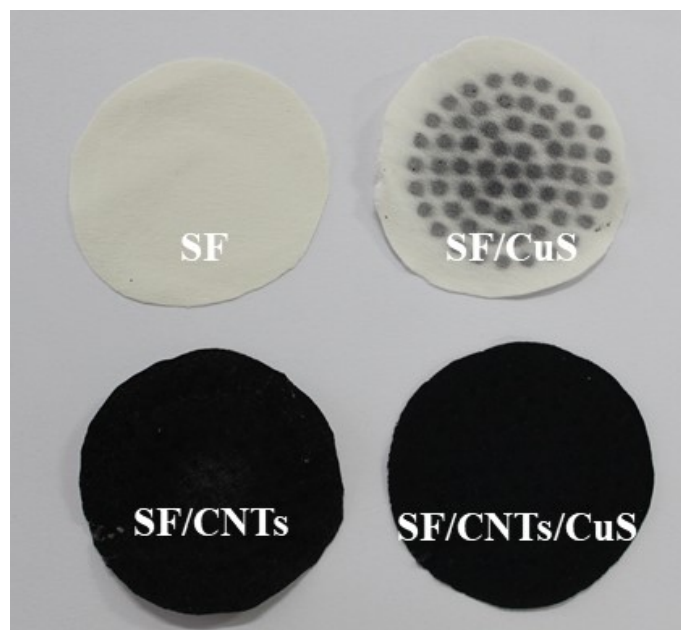

**Fig. S5.** Digital photographs of SF, SF/CuS, SF/CNTs and SF/CNTs/CuS.

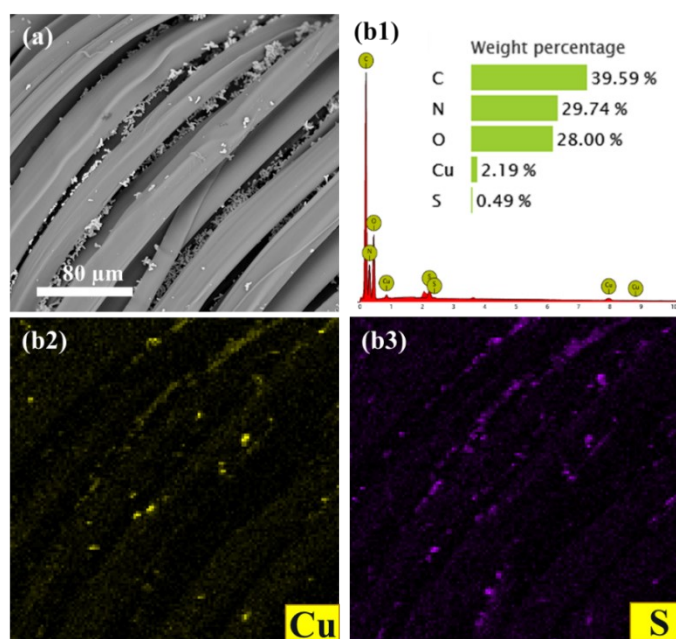

**Fig. S6.** (a) Surface morphology and (b) Elemental scanning analysis of SF/CuS.

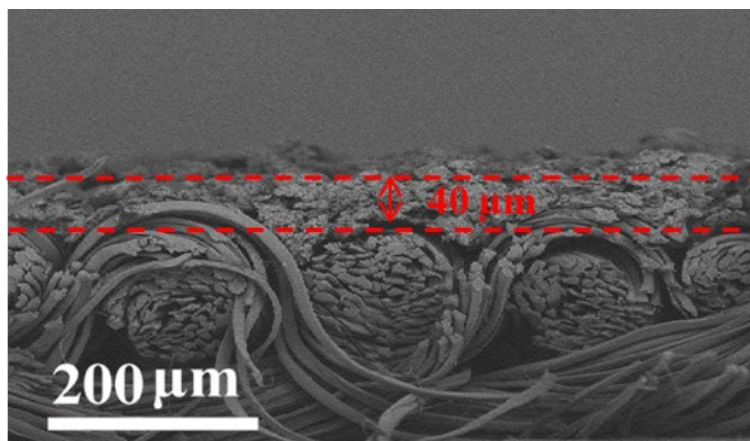

**Fig. S7.** Cross-sectional morphology of the SF/CNTs/CuS pressure sensor.

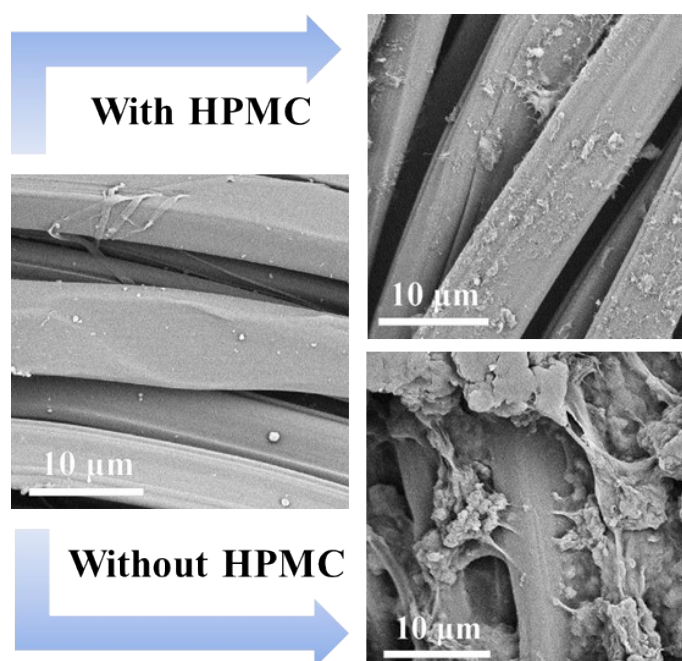

**Fig. S8.** Surface morphologies of the SF/CNTs/CuS pressure sensors with and without HPMC.

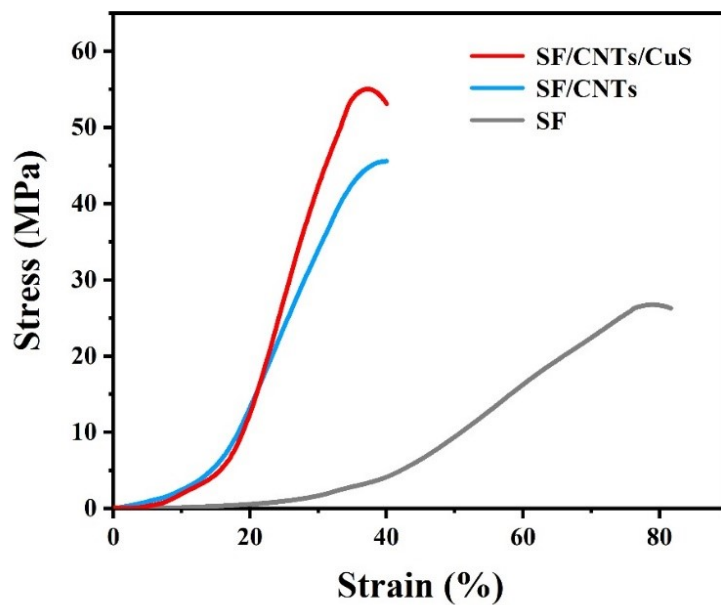

**Fig. S9.** Stress-strain curves of SF, SF/CNTs and SF/CNTs/CuS.

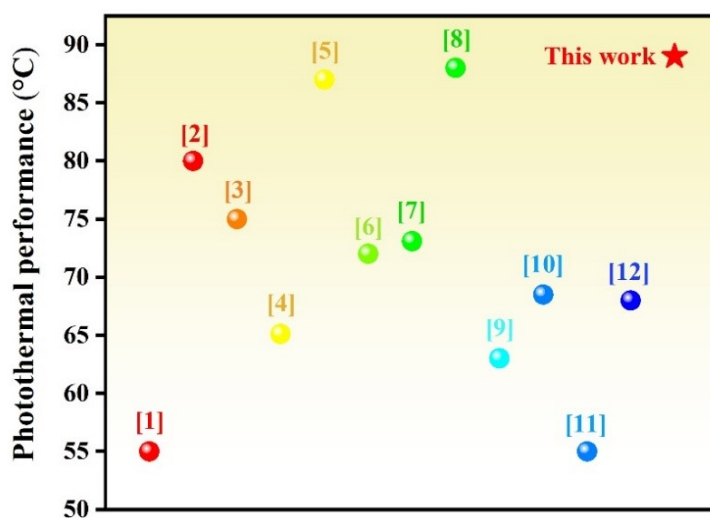

**Fig. S10.** Photothermal performance of recently reported flexible materials <sup>1-12</sup>.

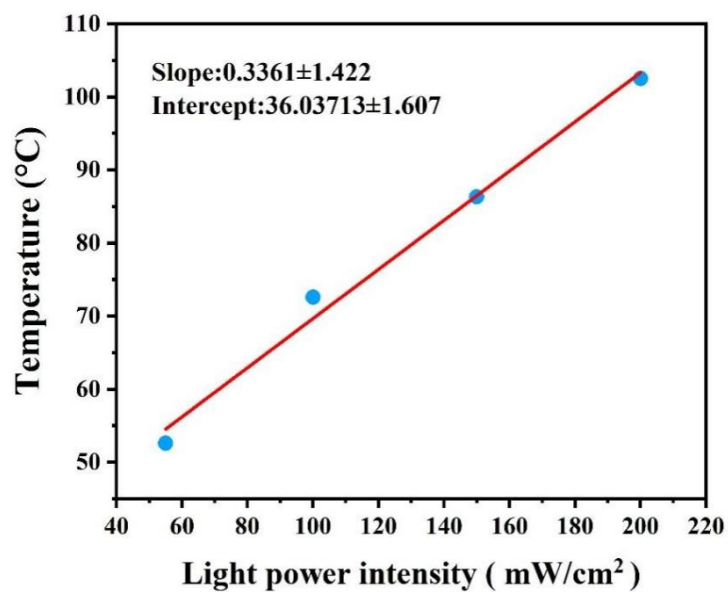

**Fig. S11.** Linear fit of temperature and light intensity of SF/CNTs/CuS.

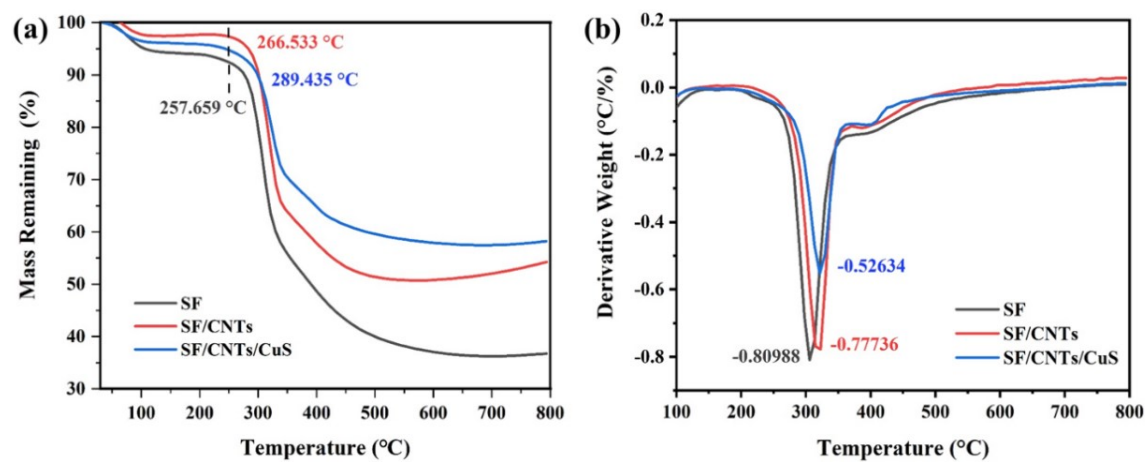

**Fig. S12.** (a) TGA and (b) DTG of SF, SF/CNTs and SF/CNTs/CuS.

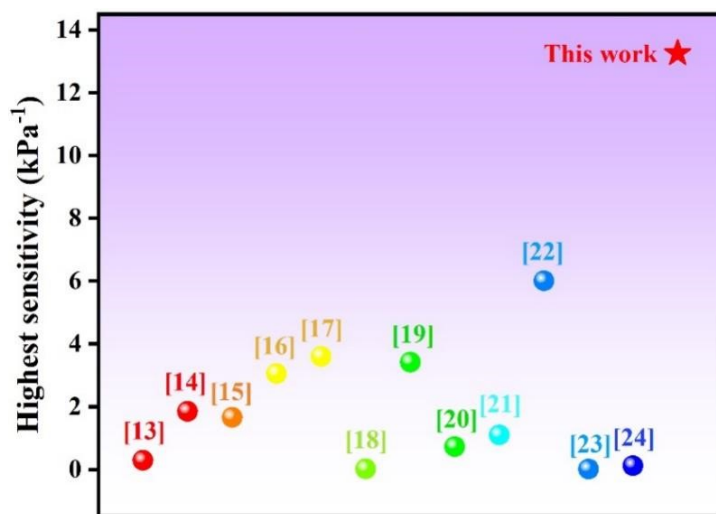

**Fig. S13.** Sensing properties of recently reported flexible pressure sensors <sup>13-24</sup>.

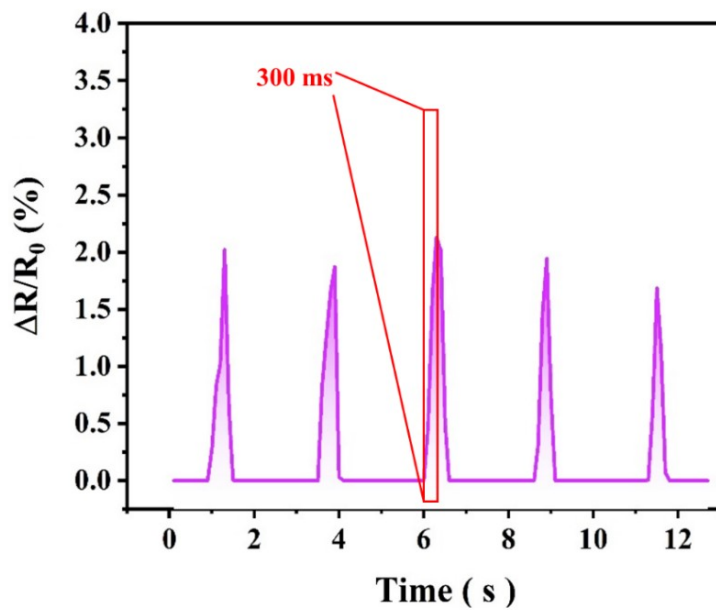

**Fig. S14.** Response time of the SF/CNTs/CuS pressure sensor.



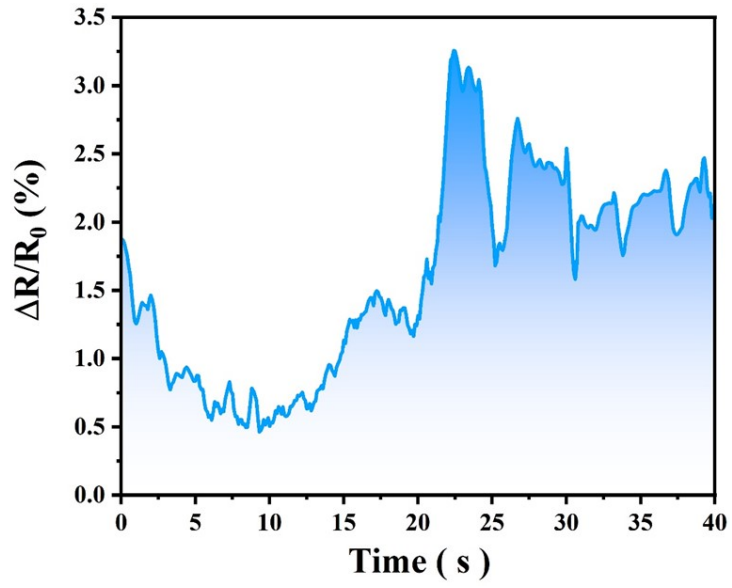

**Fig. S15.** Electronic signal for the SF/CNTs/CuS pressure sensor without HPMC.

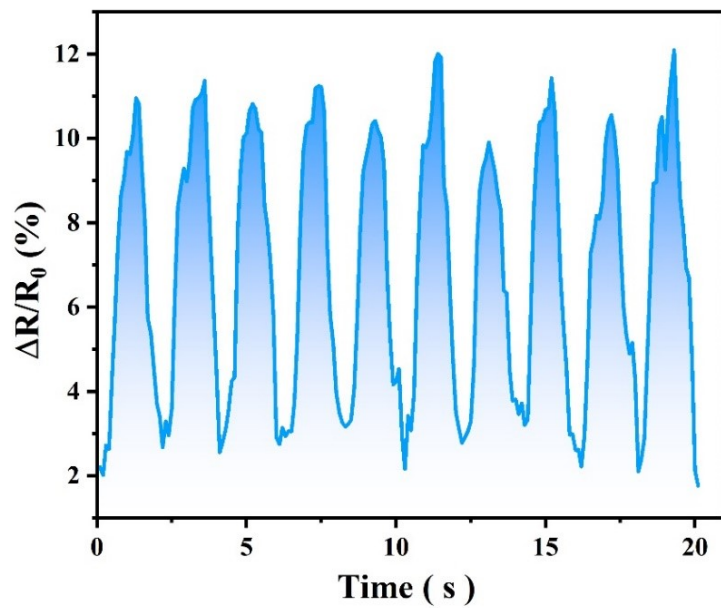

**Fig. S16.** Sensing tests of the SF/CNTs/CuS pressure sensor on finger bending.

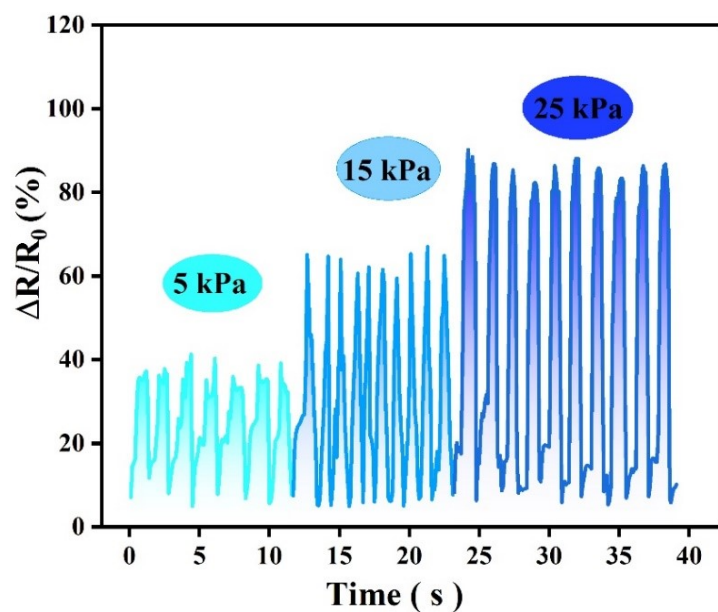

**Fig. S17.** Sensing tests of the SF/CNTs/CuS pressure sensor under different pressures at -20 °C.

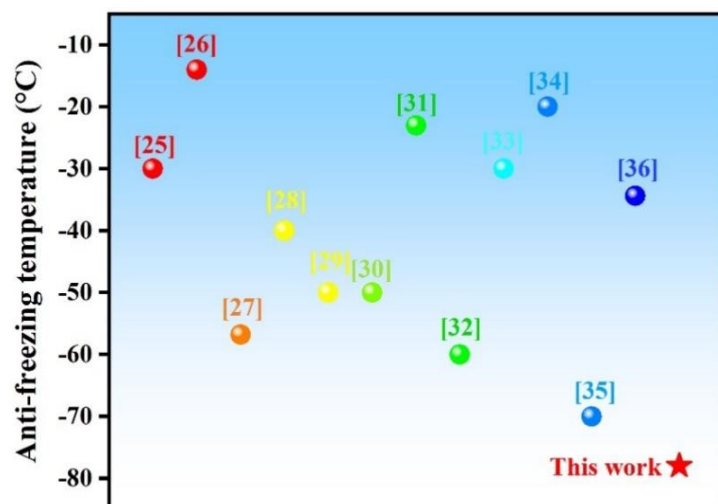

**Fig. S18.** Anti-freezing properties of recently reported anti-freezing materials <sup>25-36</sup>.

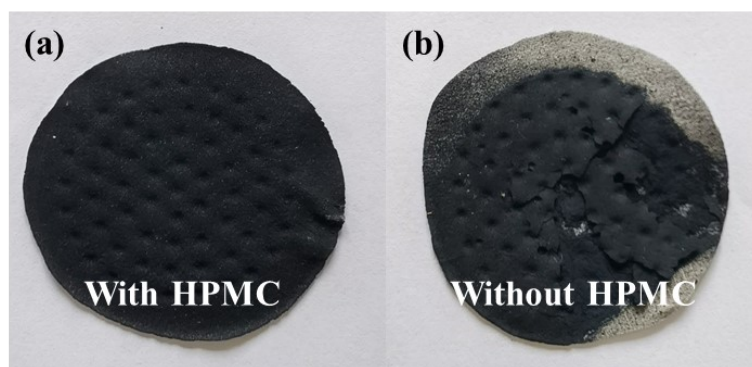

**Fig. S19.** Digital photographs of the SF/CNTs/CuS pressure sensors (a) with and (b) without HPMC after photothermal heating.

1. Y. W. Ren, B. B. Yan, P. Wang, Y. Y. Yu, L. Cui, M. Zhou and Q. Wang, *ACS Sustain. Chem. Eng.*, 2022, **10**, 2192-2203.
2. Z. R. Li, B. B. Yan, L. L. Wu, B. Xu, L. Cui, Y. Y. Yu and P. Wang, *Colloids Surf. A*, 2023, **666**, 131285.
3. Y. W. Ren, B. B. Yan, C. W. Lin, P. Wang, M. Zhou, L. Cui, Y. Y. Yu and Q. Wang, *ACS Appl. Nano Mater.*, 2023, **268**, 04797.
4. J. Chang, L. Shi, M. Zhang, R. Y. Li, Y. F. Shi, X. W. Yu, K. L. Pang, L. T. Qu, P. Wang and J. Y. Yuan, *Adv. Mater.*, 2023, **35**, 2209215.
5. F. H. Yu, P. F. Jia, L. Song, Y. Hu, B. B. Wang and R. Y. Wu, *Chem. Eng. J.*, 2023, **472**, 145091.
6. S. N. Zhang, F. C. Zhang, Z. B. Zhang, G. L. Li, R. O. S. Fu, J. Y. Huang, Y. J. Wang, Z. X. Lei, X. M. Qian and Y. K. Lai, *Chem. Eng. J.*, 2022, **450**, 138328.
7. M. L. Zhou, L. Zhang, L. S. Zhong, M. S. Chen, L. M. Zhu, T. C. Zhang, X. F. Han, Y. P. Hou and Y. M. Zheng, *Adv. Mater.*, 2024, **36**, 05322.
8. L. S. Wu, P. Liu, X. C. Hua, Z. G. Guo and W. M. Liu, *Chem. Eng. J.*, 2024, **480**, 147553.
9. J. J. Liu, C. Y. He, B. H. Liu, Z. Q. Wang, S. J. Zhao, Z. W. Lu, Y. Z. Zhang, Z. Q. Tang, X. H. Gao and X. Aday, *Chem. Eng. J.*, 2024, **489**, 151338.
10. C. H. Xue, H. G. Li, X. J. Guo, Y. R. Ding, B. Y. Liu, Q. F. An and Y. T. Zhou, *Chem. Eng. J.*, 2021, **424**, 130553.
11. B. C. Lin, W. Cai, L. Y. Qi, T. Y. Cui, Z. X. Li, M. Z. Rahman, B. Fei, Y. Hu and W. Y. Xing, *Chem. Eng. J.*, 2024, **488**, 150877.
12. M. Y. Chao, P. J. Di, Y. Yuan, Y. J. Xu, L. Q. Zhang and P. B. Wan, *Nano Energy*, 2023, **108**, 108201.
13. Z. W. Wang, Q. Y. Cai, L. T. Lu and P. A. Levkin, *Small*, 2024, **20**, 05214.
14. H. Guan, J. W. Meng, Z. Y. Cheng and X. Q. Wang, *ACS Appl. Mater. Interfaces*, 2020, **12**, 46357-46365.
15. X. Y. Qu, J. Li, Z. L. Han, Q. Q. Liang, Z. Zhou, R. M. Xie, H. P. Wang and S. Y. Chen, *ACS Nano*, 2023, **17**, 14904-14915.
16. R. C. Hu, J. H. Li, F. M. Wu, Z. Lu and C. H. Deng, *Chem. Eng. J.*, 2024, **491**, 152135.
17. G. Lee, J. Son, D. Kim, H. J. Ko, S. G. Lee and K. Cho, *Small*, 2022, **18**, 05643.
18. Q. Y. Xu, M. H. Hou, L. F. Wang, X. P. Zhang and L. F. Liu, *Chem. Eng. J.*, 2023, **477**, 147065.
19. Q. Liu, Y. Q. Zhang, X. W. Sun, C. Liang, Y. Y. Han, X. D. Wu and Z. Q. Wang, *Chem. Eng. J.*, 2023, **454**, 140302.
20. H. Yuan, Q. R. Zhang, Y. Q. Cheng, R. Y. Xu, H. R. Li, M. Y. Tian, J. M. Ma and T. F. Jiao, *J. Colloid Interface Sci.*, 2024, **670**, 41-49.
21. H. J. Men, Y. W. Sun and J. C. Li, *Chem. Eng. J.*, 2024, **495**, 153566.
22. H. Yuan, M. T. Wang, J. Q. Zhang, J. X. Wang and Y. Le, *J. Mater. Chem. A.*, 2024, **12**, 9797-9805.
23. H. J. Kil and J. W. Park, *Nano Energy*, 2023, **114**, 108636.
24. L. Wu, X. Li, J. Choi, Z. J. Zhao, L. M. Qian, B. J. Yu and I. Park, *Adv. Funct. Mater.*, 2024, **34**, 12370.
25. L. L. Cui, C. Y. Hu, W. Wang, J. Zheng, Z. J. Zhu and B. J. Liu, *J. Colloid Interface Sci.*, 2025, **677**, 273-281.
26. Z. R. He, Z. X. Zhou and W. Z. Yuan, *ACS Appl. Mater. Interfaces*, 2022, **14**, 38205-38215.

27. S. N. Li, X. F. He, Z. F. Zeng, B. Y. Jiang, Q. Wu, L. X. Gong, Y. Li, J. Bae, S. Q. Wang and L. C. Tang, *Nano Energy*, 2022, **103**, 107789.
28. Q. Y. Yu, Z. H. Qin, F. Ji, S. Chen, S. Y. Luo, M. M. Yao, X. J. Wu, W. W. Liu, X. Sun, H. T. Zhang, Y. L. Zhao, F. L. Yao and J. J. Li, *Chem. Eng. J.*, 2021, **404**, 126559.
29. J. Lyu, Q. Y. Zhou, H. F. Wang, Q. Xiao, Z. Qiang, X. P. Li, J. Wen, C. H. Ye and M. F. Zhu, *Adv. Sci.*, 2023, **10**, 06591.
30. Z. J. Chen, H. Liu, X. Y. M. Lin, X. M. Mei, W. Lyu and Y. Z. Liao, *Mater. Horiz.*, 2023, **10**, 3569-3581.
31. Y. T. Song, L. Niu, P. L. Ma, X. Li, J. C. Feng and Z. M. Liu, *ACS Appl. Mater. Interfaces*, 2023, **617**, 10006-10017.
32. W. C. Zhao, J. L. Jiang, W. T. Chen, Y. Q. He, T. R. Lin and L. Zhao, *Chem. Eng. J.*, 2023, **468**, 143660.
33. X. Y. Zhao, Z. Wang, Z. R. Liu, S. C. Yao, J. M. Zhang, Z. C. Zhang, T. Huang, L. Zheng, L. L. Li and Z. L. Wang, *Nano Energy*, 2022, **96**, 107067.
34. X. Han, Y. Y. Su, G. D. Che, J. H. Zhou and Y. Li, *ACS Sustain. Chem. Eng.*, 2023, **11**, 8255-8270.
35. W. Zhu, Y. Zhang, S. Huang, L. Geng, J. Wu, G. Mao, X. Peng and Y. Cheng, *Chem. Eng. J.*, 2024, **497**, 154409.
36. L. L. Cui, W. Wang, J. Zheng, C. Y. Hu, Z. J. Zhu and B. J. Liu, *Carbohydr. Polym.*, 2024, **342**, 122406.
